# Supplementary material for: Phytotoxic Activity of Metabolites Isolated from Rutstroemia sp.n., the Causal Agent of Bleach Blonde Syndrome on Cheatgrass (Bromus tectorum)
Source: PubMed Central journal article supplement (PMC6100615; doi:10.3390/molecules23071734), 2018-07-16

## SUPPLEMENTARY MATERIAL

Article

# Phytotoxic Activity of Metabolites Isolated from *Rutstroemia sp.n.*, the Causal Agent of Bleach Blonde Syndrome on Cheatgrass (*Bromus Tectorum*)

Marco Masi <sup>1</sup>, Susan Meyer <sup>2</sup>, Marcin Górecki <sup>3,4</sup>, Gennaro Pescitelli <sup>3</sup>, Suzette Clement <sup>2</sup>, Alessio Cimmino <sup>1</sup> and Antonio Evidente <sup>1,\*</sup>

<sup>1</sup> Dipartimento di Scienze Chimiche, Università di Napoli “Federico II”, Complesso Universitario Monte S. Angelo, Via Cintia 4, 80126 Napoli, Italy; marco.masi@unina.it (M.M.); alessio.cimmino@unina.it (A.C.)

<sup>2</sup> US Forest Service Rocky Mountain Research Station, Shrub Sciences Laboratory, 735 North 500 East, Provo, UT 84606, USA; semeyer@xmission.com (S.M.); sclement@fs.fed.us (S.C.)

<sup>3</sup> Dipartimento di Chimica e Chimica Industriale, Università di Pisa, Via Moruzzi 13, 56124 Pisa, Italy; gennaro.pescitelli@unipi.it (G.P.); marcin.gorecki@icho.edu.pl (M.G.)

<sup>4</sup> Institute of Organic Chemistry, Polish Academy of Sciences, ul. Kasprzaka 44/52, 01-224 Warsaw, Poland

\* Correspondence: evidente@unina.it; Tel.: +39-081-253-9178

Received: 25 June 2018; Accepted: 12 July 2018; Published: date

### List of content

Page 2: **Scheme S1.** Fractionation scheme of the fungal metabolites.

Page 3: **Spectra 1.** <sup>1</sup>H NMR spectrum of 9-*O*-methylfusarubin (**1**) (CDCl<sub>3</sub>, 500 MHz).

Page 4: **Spectra 2.** <sup>1</sup>H NMR spectrum of 9-*O*-methylbostrycoidin (**2**) CDCl<sub>3</sub>, 500 MHz).

Page 5: **Spectra 3.** <sup>1</sup>H NMR spectrum of 5-*O*-methylnectriafurone (**3**) (CDCl<sub>3</sub>, 400 MHz).

Page 6: **Spectra 4.** <sup>1</sup>H NMR spectrum of *trans*-methyl-*p*-coumarate (**4**) (CDCl<sub>3</sub>, 500 MHz).

Page 7: **Spectra 5.** <sup>1</sup>H NMR spectrum of terpestacin (**5**) (CDCl<sub>3</sub>, 400 MHz).

Scheme S1. Fractionation scheme of the fungal metabolites.

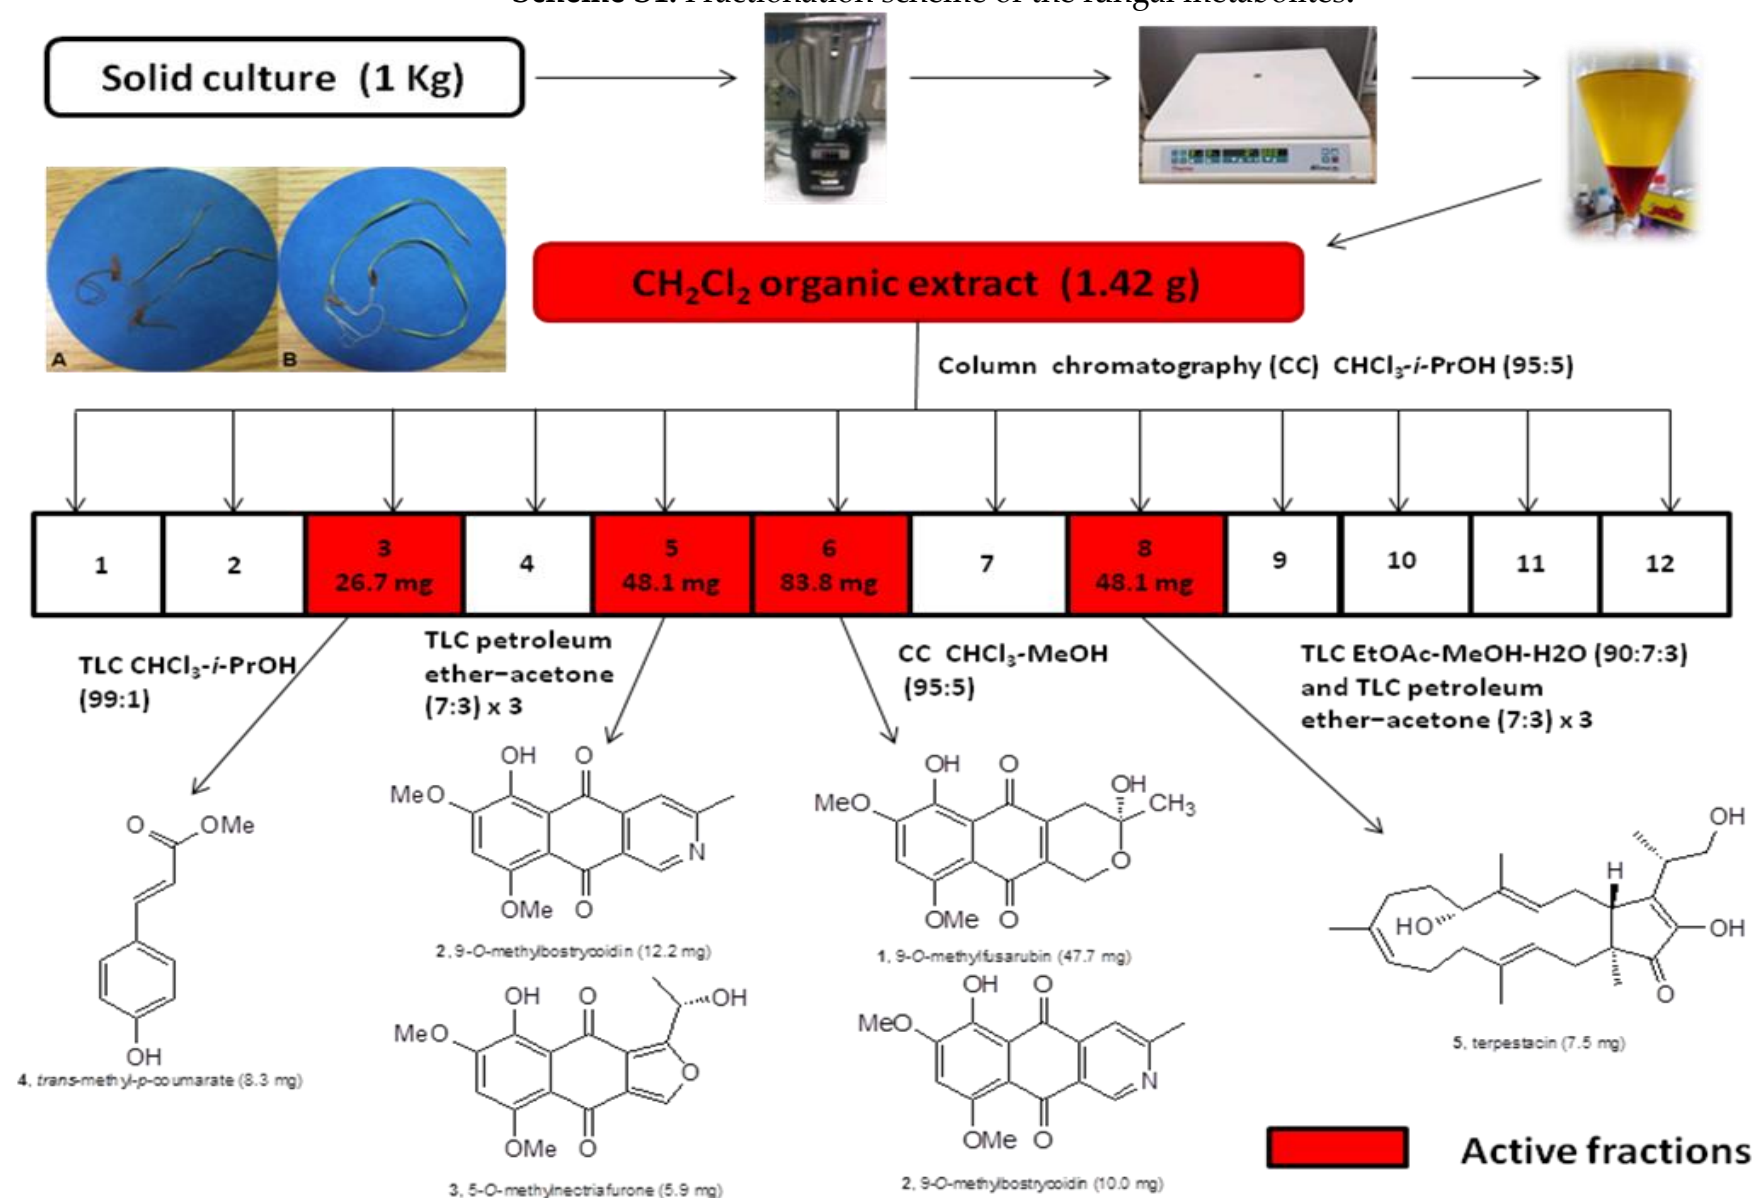

**Spectra 1.**  $^1\text{H}$  NMR spectrum of 9-O-methylfusarubin (1) ( $\text{CDCl}_3$ , 500 MHz).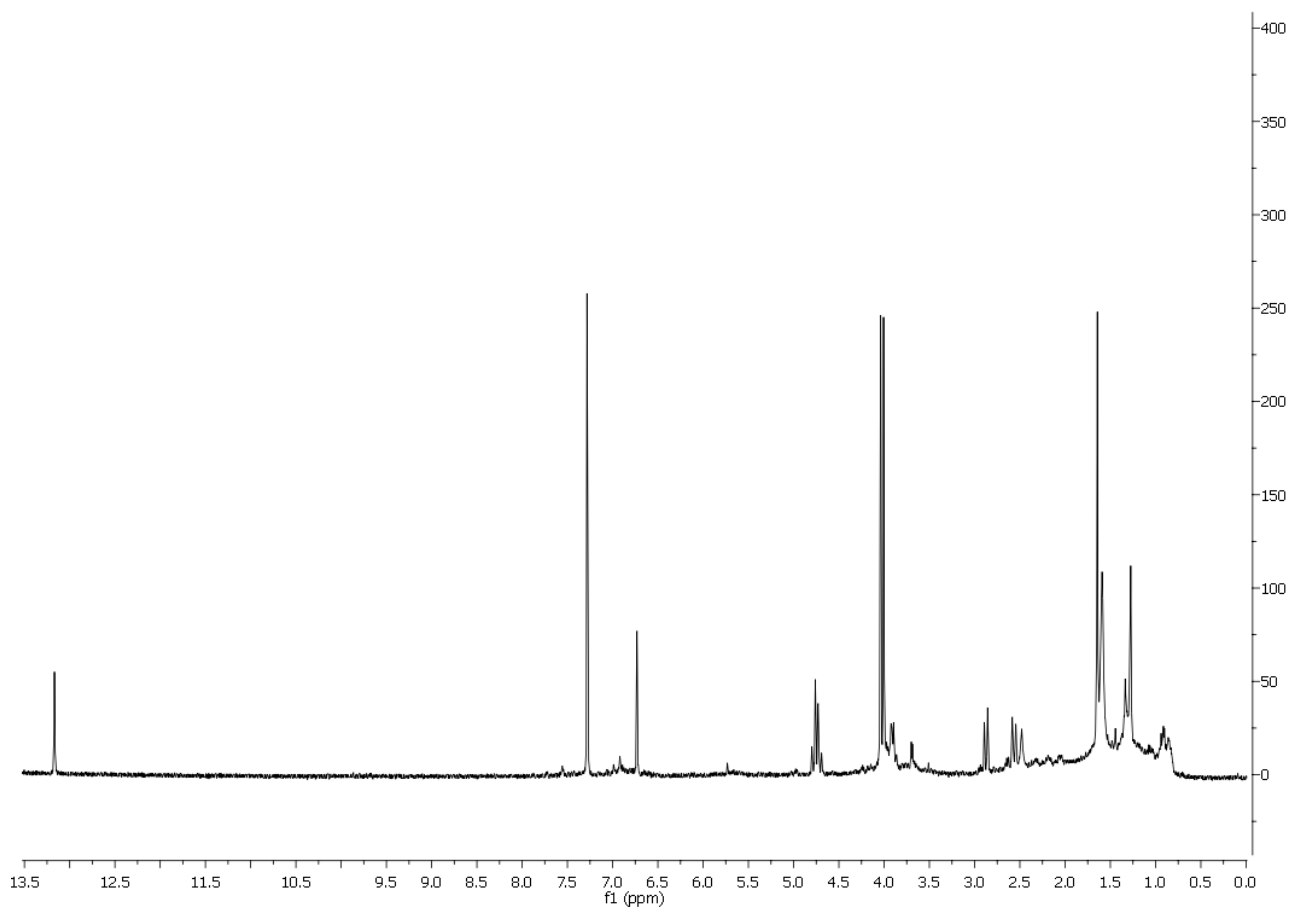

**Spectra 2.**  $^1\text{H}$  NMR spectrum of 9-*O*-methylbostrycoidin (**2**)  $\text{CDCl}_3$ , 500 MHz).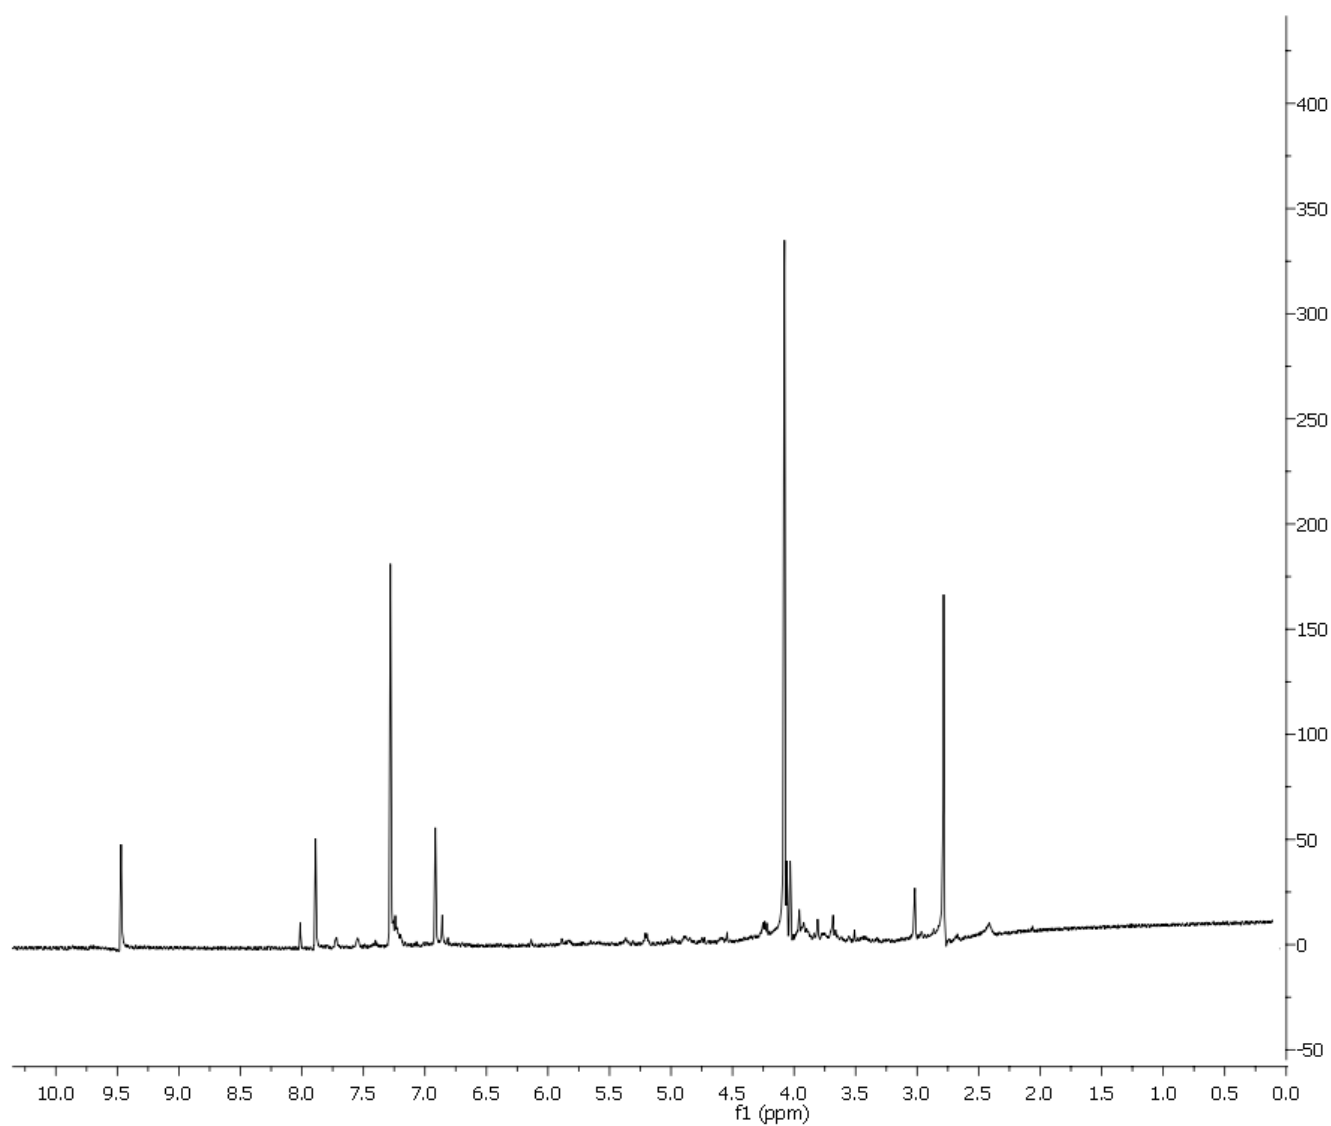

**Spectra 3.**  $^1\text{H}$  NMR spectrum of 5-*O*-methylnectriafurone (**3**) ( $\text{CDCl}_3$ , 400 MHz).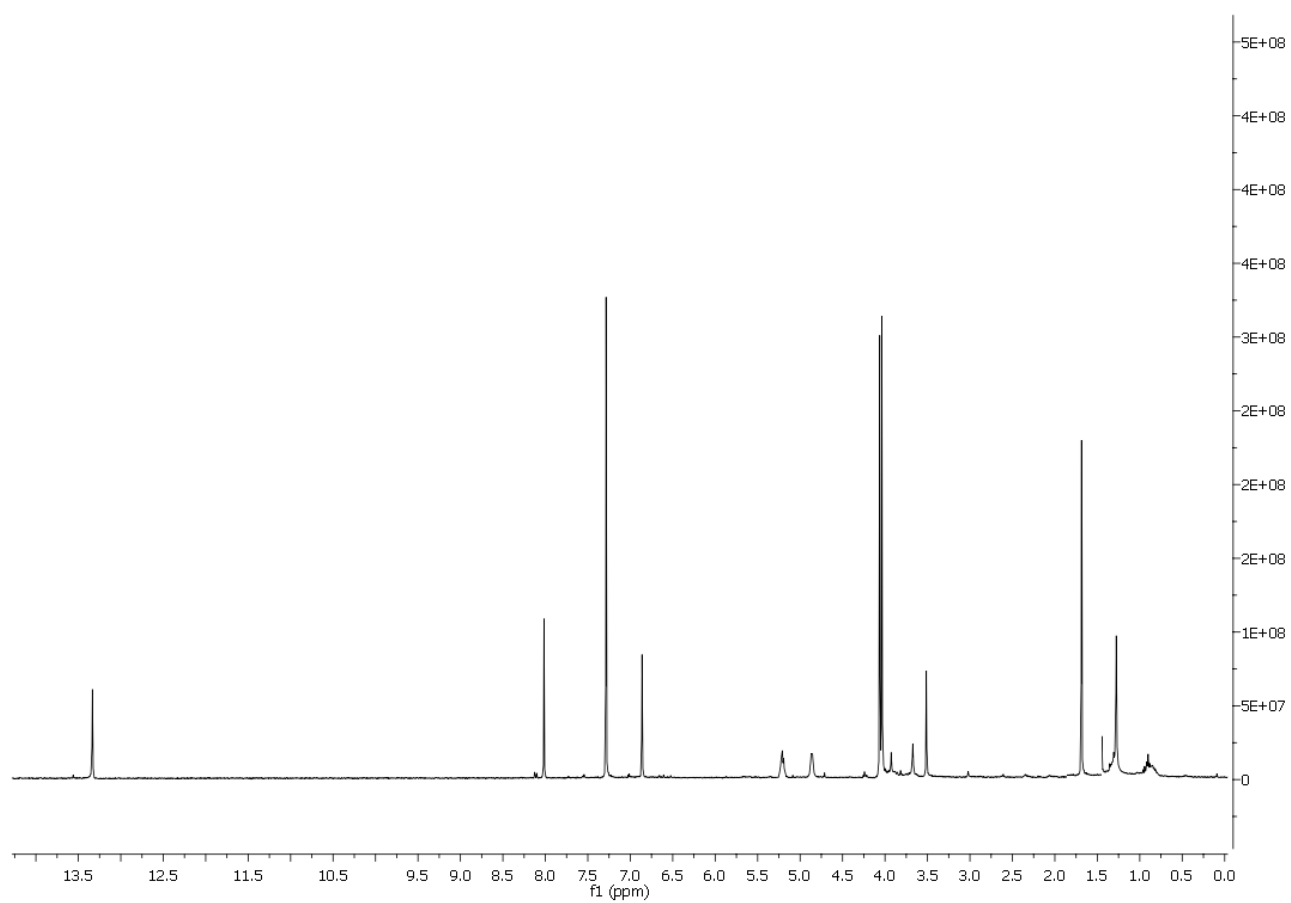

**Spectra 4.**  $^1\text{H}$  NMR spectrum of *trans*-methyl-*p*-coumarate (**4**) ( $\text{CDCl}_3$ , 500 MHz).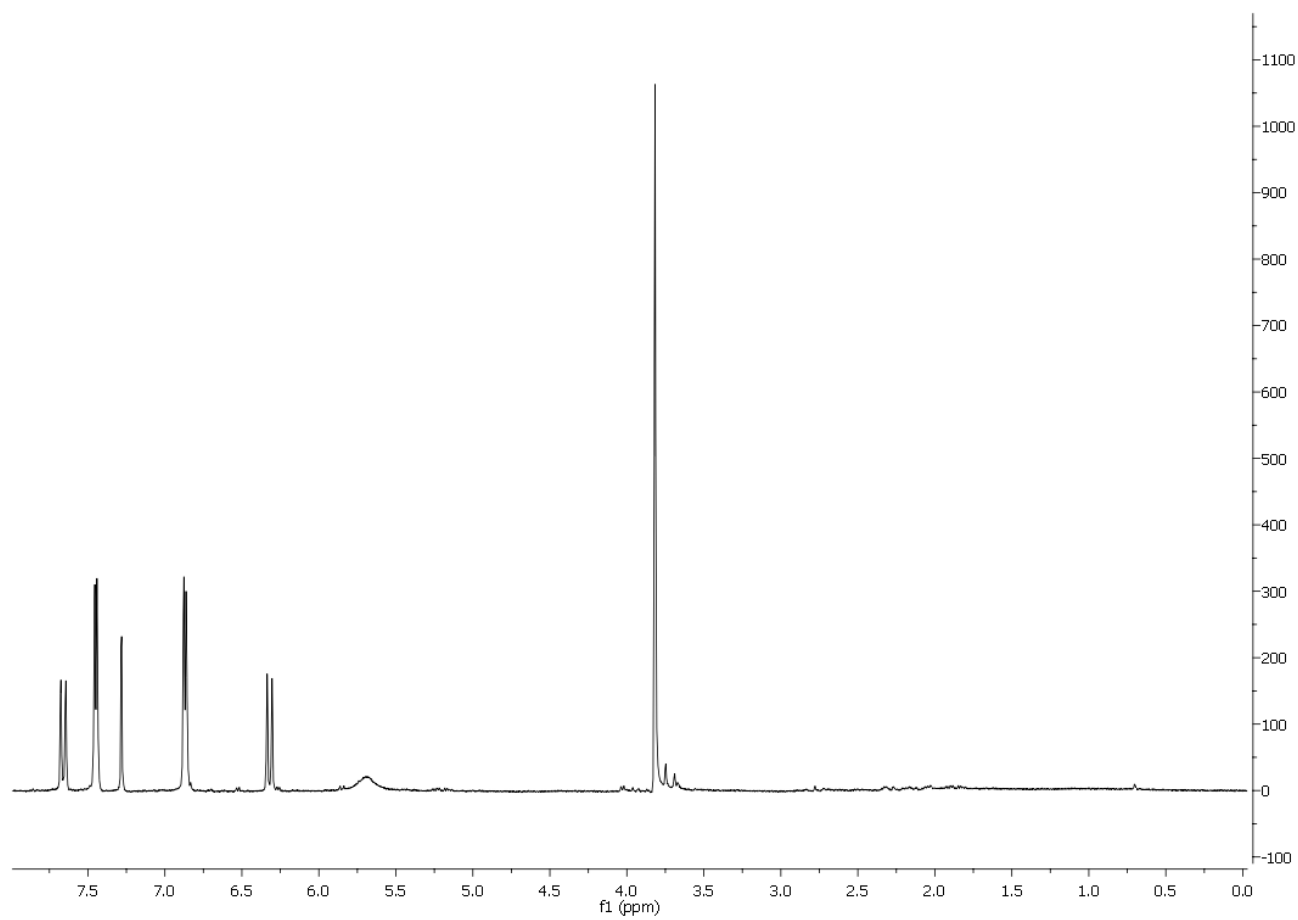

**Spectra 5.**  $^1\text{H}$  NMR spectrum of terpestacin (5) ( $\text{CDCl}_3$ , 400 MHz).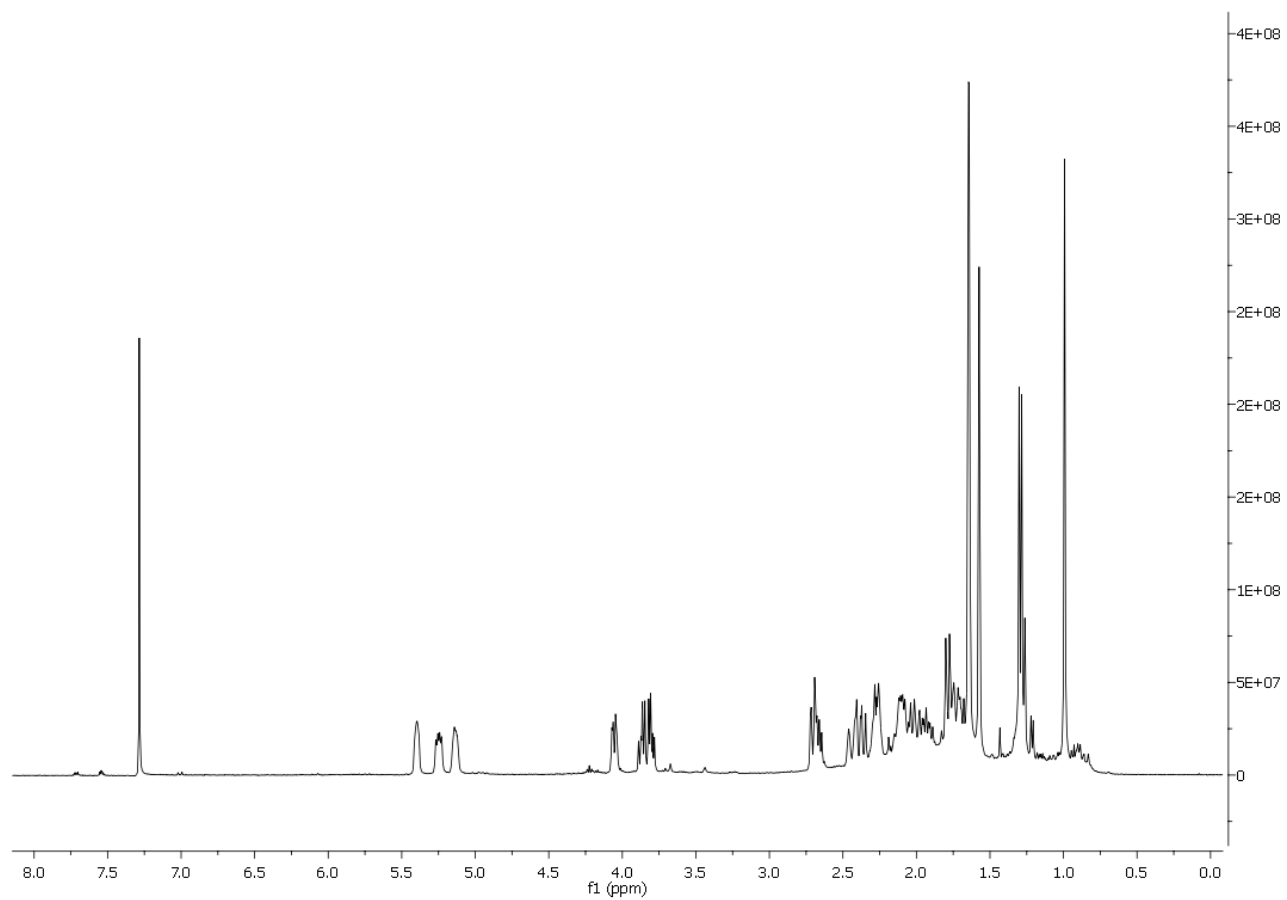

Supplement: molecules-23-01734-s001.pdf [file molecules-23-01734-s001.pdf]
